# Supplementary material for: Breast milk DHA levels may increase after informing women: a community-based cohort study from South Dakota USA
Source: PubMed Central journal article supplement (PMC5273852; doi:10.1186/s13006-016-0099-0), 2017-01-28
Supplement: 13006_2016_99_MOESM2_ESM.pdf [file 13006_2016_99_MOESM2_ESM.pdf]

Subject No. \_\_\_\_\_ (to be completed by research staff)

**Baseline Questionnaire**  
Mother's Milk DHA Study  
University of South Dakota School of Medicine

Please fill out this short questionnaire and send it in with your first dried milk sample. If you have any questions, please do not hesitate to contact us at [info@omegaquant.com](mailto:info@omegaquant.com). Thank you for your participation!

1. **Name** \_\_\_\_\_ 2. **Email** \_\_\_\_\_
3. **Home Address** \_\_\_\_\_
4. **Phone** \_\_\_\_\_
5. **Age** \_\_\_\_\_
6. **Race/ethnicity (optional; circle)**      Asian/Pacific Islander      Black/African  
American      Hispanic      American Indian      White/Caucasian
7. **Pre-Pregnancy Height** \_\_\_\_\_ ft \_\_\_\_\_ in
8. **Pre-Pregnancy Weight** \_\_\_\_\_ pounds
9. **Highest Education**    Less than high school    High school    Some college    Associate's degree  
Bachelor's degree      Post-Graduate Degree (i.e., Masters, Doctoral, etc.)
10. **Number of total pregnancies** \_\_\_\_\_
11. **Do you currently take a DHA supplement (fish oil, krill oil, or prenatal vitamin)?**  
Yes    No  
    If yes, please indicate    Number of pills per week \_\_\_\_\_  
    Amount of DHA per pill \_\_\_\_\_ mg\*
12. **During your last trimester, did you regularly take prenatal vitamin containing DHA?**  
Yes    No      If yes, please indicate the amount of DHA per pill \_\_\_\_\_ mg\*
13. **How many times per month on average do you eat tuna or other non-fried fish as a main course?** \_\_\_\_\_
14. **How much weight did you gain during this past pregnancy?** \_\_\_\_\_ pounds
15. **At how many weeks gestation did you deliver?** \_\_\_\_ weeks
16. **How long have you been lactating?** \_\_\_\_ weeks
17. **Did you have diabetes during this past pregnancy?**      Yes    No
18. **At what time of day did you collect (are you collecting) the milk sample?** \_\_\_\_ AM / PM

- if you don't remember these details, you can answer them on the second questionnaire which will be sent to your home
