# Supplementary material for: Breast milk DHA levels may increase after informing women: a community-based cohort study from South Dakota USA
Source: PubMed Central journal article supplement (PMC5273852; doi:10.1186/s13006-016-0099-0), 2017-01-28
Supplement: 13006_2016_99_MOESM3_ESM.pdf [file 13006_2016_99_MOESM3_ESM.pdf]

## Mother's Milk DHA Study - Follow-up Questionnaire

Please fill out this short follow-up questionnaire and return it along with your dried milk sample. If you have any questions, please do not hesitate to contact any of the investigators conducting this study at [info@omegaquant.com](mailto:info@omegaquant.com). Thank you for your participation!

Bill Harris, PhD  
Michelle Baack, MD  
Brian Juber, MS-3, Sanford School of Medicine

1. Name: \_\_\_\_\_

2. Please indicate any changes in your contact information: \_\_\_\_\_  
\_\_\_\_\_

3. Did the results of your first Mother's Milk DHA Test motivate you to change your diet? Yes No

If yes, please indicate which food(s) you used to increase your intake of DHA:

| _____ Fish                          | _____ Other foods rich in omega-3's |
|-------------------------------------|-------------------------------------|
| _____ Salmon                        | _____ Flaxseed                      |
| _____ Tuna                          | _____ Walnuts                       |
| _____ Herring                       | _____ Soybeans                      |
| _____ Trout                         | _____ Tofu                          |
| _____ Sardines                      | _____ Brussels sprouts              |
| _____ Crab                          | _____ Cauliflower                   |
| _____ Oysters                       | _____ Squash                        |
| _____ Clams                         | _____ Other (please indicate below) |
| _____ Shrimp                        | _____                               |
| _____ Catfish                       |                                     |
| _____ Tilapia                       |                                     |
| _____ Other (please indicate below) |                                     |

How many days per week did you eat the above food? \_\_\_\_\_

4. Did the results of your first Mother's Milk DHA Test motivate you to start taking a supplement?

Yes No

If yes, how many pills per week did you take? \_\_\_\_\_ pills

If yes, please indicate the amount of DHA contained in each capsule: \_\_\_\_\_ mg

**Please complete and return this form with your repeat milk spot sample to OmegaQuant<sup>®</sup> in the envelope provided.**

\*Submission of this milk sample for analysis indicates that the person named above understands the purpose and procedures of this study and thereby agrees to participate.
